# Supplementary material
Source: MDPI journal article supplement (https://www.mdpi.com/2227-9717/10/10/2063)
Supplement: s1 [file s1]

V.O. Abramov <sup>1</sup>, A.V. Abramova <sup>1,\*</sup>, V.M. Bayazitov <sup>1</sup>, S.V. Kameneva <sup>1</sup>, V.O. Veselova <sup>1</sup>, D.A. Kozlov <sup>1</sup>, M.M. Soz-  
arukova <sup>1</sup>, A.E. Baranchikov <sup>1</sup>, I.S. Fedulov <sup>1</sup>, R.V. Nikonov <sup>1</sup> and G. Cravotto <sup>2,\*</sup>

1. Kurnakov Institute of General and Inorganic Chemistry of the Russian Academy of Sciences, Leninsky  
Prospekt 31, 119991, Moscow, Russia.

2. Department of Drug Science and Technology, University of Turin, Via. P. Giuria 9, 10125, Turin, Italy.

**Table S1.** Composition of municipal water used for the experiments (the methods used to analyze water comply with the national environmental protection regulations and state standards of the Russian Federation for statistical methods of water quality control).

| Parameter                     | Unit of measurement           | Result   | Margin of error | Quality standard |
|-------------------------------|-------------------------------|----------|-----------------|------------------|
| pH                            | pH units                      | 7,9      | ±0,2            | 6,0-9,0          |
| Hardness                      | mg-equ/dm <sup>3</sup>        | 3,6      | ±0,5            | 7,0              |
| Al                            | mg/L<br>(mg/dm <sup>3</sup> ) | <0,04    | -               | 0,2              |
| Fe                            | mg/L<br>(mg/dm <sup>3</sup> ) | 0,52     | ±0,10           | 0,3              |
| Cd                            | mg/L<br>(mg/dm <sup>3</sup> ) | 0,000042 | ±0,000025       | 0,001            |
| Ca                            | mg/L<br>(mg/dm <sup>3</sup> ) | 53       | ±6              | -                |
| Mg                            | mg/L<br>(mg/dm <sup>3</sup> ) | 11,6     | ±2,1            | 50               |
| Mn                            | mg/L<br>(mg/dm <sup>3</sup> ) | 0,096    | ±0,027          | 0,1              |
| Cu                            | mg/L<br>(mg/dm <sup>3</sup> ) | 0,024    | ±0,006          | 1,0              |
| As                            | mg/L<br>(mg/dm <sup>3</sup> ) | <0,0005  | -               | 0,01             |
| Ni                            | mg/L<br>(mg/dm <sup>3</sup> ) | 0,0027   | ±0,0010         | 0,02             |
| Hg                            | mg/L<br>(mg/dm <sup>3</sup> ) | <0,0001  | -               | 0,0005           |
| Pb                            | mg/L<br>(mg/dm <sup>3</sup> ) | 0,00032  | ±0,00019        | 0,01             |
| Cr                            | mg/L<br>(mg/dm <sup>3</sup> ) | 0,0022   | ±0,0010         | 0,05             |
| Zn                            | mg/L<br>(mg/dm <sup>3</sup> ) | 0,095    | ±0,027          | 5,0              |
| NH <sub>4</sub> <sup>+</sup>  | mg/L<br>(mg/dm <sup>3</sup> ) | 0,43     | ±0,11           | 2,0              |
| HCO <sub>3</sub> <sup>-</sup> | mg/L<br>(mg/dm <sup>3</sup> ) | 187      | ±22             | -                |
| CO <sub>3</sub> <sup>2-</sup> | mg/L<br>(mg/dm <sup>3</sup> ) | <6       | -               | -                |
| NO <sub>3</sub> <sup>-</sup>  | mg/L<br>(mg/dm <sup>3</sup> ) | 0,60     | ±0,11           | 45               |
| NO <sub>2</sub> <sup>-</sup>  | mg/L<br>(mg/dm <sup>3</sup> ) | <0,02    | -               | 3,0              |
| SO <sub>4</sub> <sup>2-</sup> | mg/L                          | 43       | ±4              | 500              |

|                 |                               |      |       |     |
|-----------------|-------------------------------|------|-------|-----|
|                 | (mg/dm <sup>3</sup> )         |      |       |     |
| F <sup>-</sup>  | mg/L<br>(mg/dm <sup>3</sup> ) | 0,18 | ±0,03 | 1,5 |
| Cl <sup>-</sup> | mg/L<br>(mg/dm <sup>3</sup> ) | 31   | ±5    | 350 |
